# Supplementary figures and images for: Outpatient Antibiotic Prescribing Patterns and Appropriateness for Children in Primary Healthcare Settings in Beijing City, China, 2017–2019
Source: MDPI journal article supplement (doi:10.3390/antibiotics10101248), 2021-10-14

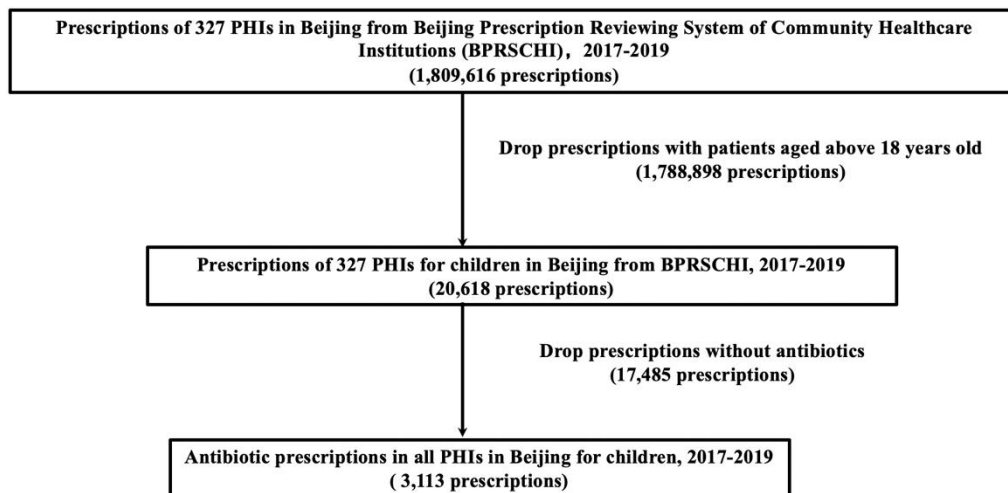

**Figure S1.** Selection of antibiotic prescriptions for children.

Supplement: s1 [file s1]
